# Supplementary material for: The effect of surface modification on the fluorescence and morphology of CdSe nanoparticles embedded in a 3D phosphazene-based matrix: nanowire-like quantum dots
Source: Royal Society of Chemistry journal article supplement (doi:10.1039/c0jm02360d), 2010-11-25
Supplement: c0jm02360d.pdf [file c0jm02360d.pdf]

**Table S1** The results from time-resolved fluorescence measurements

| Table of results from time-resolved fluorescence measurements |                      |                     |       |       |       |       |               |               |               |               |               |
|---------------------------------------------------------------|----------------------|---------------------|-------|-------|-------|-------|---------------|---------------|---------------|---------------|---------------|
| sample                                                        | $\lambda_{exc}$ (nm) | $\lambda_{em}$ (nm) | $A_1$ | $A_2$ | $A_3$ | $A_4$ | $\tau_1$ (ns) | $\tau_2$ (ns) | $\tau_3$ (ns) | $\tau_4$ (ns) | $\tau_M$ (ns) |
| CdSe                                                          | 445                  | 610                 | 0.47  | 0.28  | 0.22  | 0.02  | 0.39          | 4.5           | 18.0          | 56            | 22.6          |
|                                                               | 445                  | 670                 | 0.36  | 0.21  | 0.32  | 0.12  | 0.38          | 4.8           | 26.8          | 61            | 40.1          |
| PolyCdSe                                                      | 445                  | 600                 | 0.44  | 0.24  | 0.29  | 0.03  | 0.34          | 4.8           | 20.6          | 74            | 32.0          |
|                                                               | 445                  | 670                 | 0.51  | 0.19  | 0.23  | 0.07  | 0.40          | 4.5           | 27.5          | 75            | 45.9          |
| BenzCdSe                                                      | 445                  | 570                 | 0.65  | 0.21  | 0.12  | 0.02  | 0.31          | 3.5           | 18.4          | 75            | 32.4          |
|                                                               | 308                  | 570                 | 0.62  | 0.26  | 0.12  |       | 0.51          | 5.7           | 28.5          |               | 20.3          |
|                                                               | 308                  | 380                 | 0.53  | 0.32  | 0.15  |       | 0.54          | 2.3           | 6.5           |               | 4.1           |
| CompBenz CdSe                                                 | 308                  | 360                 | 0.72  | 0.27  | 0.01  |       | 0.45          | 1.89          | 9.5           |               | 2.4           |
|                                                               | 308                  | 500                 | 0.69  | 0.19  | 0.10  | 0.02  | 0.08          | 0.91          | 3.3           | 9.0           | 4.1           |
|                                                               | 308                  | 690                 | 0.59  | 0.35  | 0.06  |       | 0.01          | 0.68          | 3.6           |               | 1.8           |
